# Supplementary material for: “Nanocatalyst ∪ reagent-on-a-polymer film”: a new polymer-supported system for (electro-)catalytic reactions
Source: Royal Society of Chemistry journal article supplement (doi:10.1039/c0cc04151c), 2011-01-01
Supplement: c0cc04151c.pdf [file c0cc04151c.pdf]

Supplementary Material (ESI) for Chemical Communications

## **“Nanocatalyst $\cup$ reagent-on-a-polymer film”: A new polymer-supported system for (electro-)catalytic reactions**

**Chinnaiah Sivakumar and Kanala Lakshminarasimha Phani\***

Nanoscale Electrocatalysis & Sensor Research Group,  
Electrodeics and Electrocatalysis Division,  
CSIR-Central Electrochemical Research Institute, Karaikudi,  
Tamil Nadu, India. Fax: + 91-4565-227779; Tel: + 91-4565-227550;  
E-mail: [kanalaphani@yahoo.com](mailto:kanalaphani@yahoo.com) (K.L.N.Phani) [ccsivakumar@yahoo.com](mailto:ccsivakumar@yahoo.com) (C. Sivakumar)

### **Experimental for the preparation of PEDOT support and loading of metal nanocatalyst**

Good quality PEDOT-ClO<sub>4</sub> films were deposited on a clean glassy carbon electrode by potential cycling of GC electrode in acetonitrile solutions of EDOT monomer and Bu<sub>4</sub>NClO<sub>4</sub> in a range between -0.8 and 1.5 V *vs* Ag wire reference in a solution containing 0.025 M EDOT monomer and 0.025 tetrabutylammonium perchlorate in acetonitrile at a scan rate of 0.05 Vs<sup>-1</sup>. Loading of metal nanoparticles (Pt, Au) on PEDOT matrix was achieved by chemical reduction by CNBH<sub>3</sub><sup>-</sup> ion doped film. First, the PEDOT film was dipped into 0.1M TBACNBH<sub>3</sub> + acetonitrile for ion exchange process. The extent of cyanoborohydride doping in PEDOT film can be varied with different immersion time periods: 3 hrs, 6 hrs, 9 hrs, 12 hrs and 24 hrs respectively. A representative CV feature clearly indicates the extent of loading of cyanoborohydride through ion exchange process (Fig. S1). In the second step, the CNBH<sub>3</sub><sup>-</sup> doped PEDOT film was dipped in 2 mM solution of metal precursor solutions for a few seconds and the dipped film was allowed to dry for 10-15 minutes before recording the cyclic voltammogram. The desired loading of metal nanoparticles in PEDOT matrix was achieved by varying the immersion period of CNBH<sub>3</sub> doped PEDOT film. Cyclic voltammograms were recorded for each loading of metal nanocatalyst on PEDOT in 0.5M H<sub>2</sub>SO<sub>4</sub> at a scan rate of 50mV/s. CV patterns of metal nanoparticles encapsulated PEDOT matrix were obtained after 10 cycles in the background electrolyte (blank).

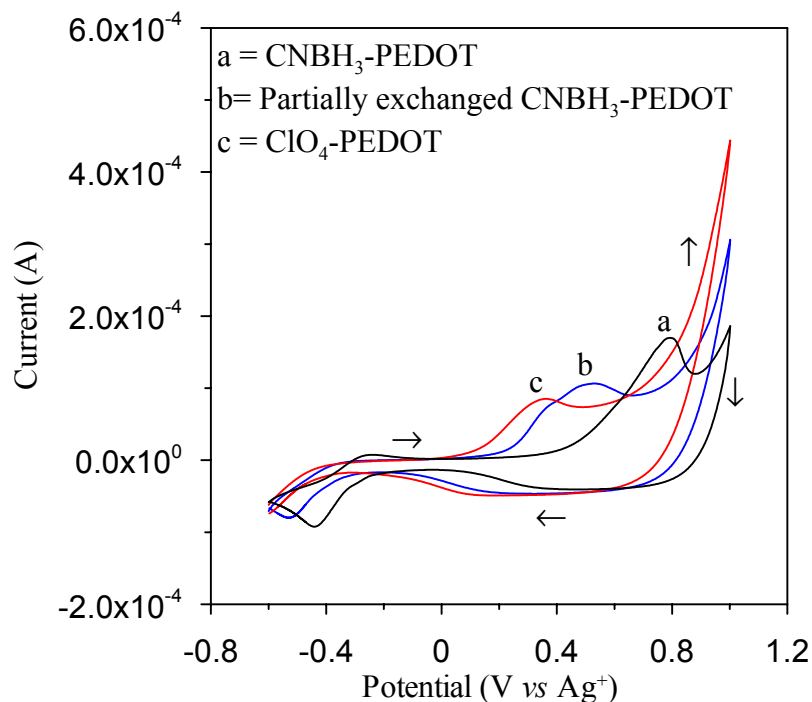

**Fig. S1** Cyclic voltammograms of  $\text{CNBH}_3^-$  doped PEDOT (a), partially exchanged  $\text{CNBH}_3^-$  doped PEDOT (b),  $\text{ClO}_4^-$  doped PEDOT (c) film in acetonitrile medium at a scan rate of 50mV/s.

***Percentage of doping level in PEDOT matrix determined by Laser-Raman spectroscopy***

Laser Raman spectroscopy was used to estimate the percentage doping level of PEDOT film. In this study, the oxidized PEDOT film gets de-doped by applying -0.1V for 10-15 minutes as was indicated by the color of the film to be dark blue. Re-doping process was performed by chronoamperometry in solutions containing 0.1 M  $(\text{C}_4\text{H}_7)_4\text{N}^+ \text{CNBH}_3^-$  in acetonitrile at different applied potentials (0.1V, 0.3V, 0.45V, 0.55V, 1.0V, and 1.5V) for a period of 10 minutes. Before recording the spectra, the PEDOT film was dipped in acetone for a few seconds to remove any loosely bound material. *Ex-situ* Raman spectroscopy with 785 nm excitation was used to study the resonance Raman shift of the -C-C- to carbon stretching band positions in the vibrational mode, particularly symmetric  $\text{C}_\alpha=\text{C}_\beta$  vibrations, due to changes in the electronic structure of PEDOT upon incorporation of dopants.

Raman spectra recorded for the de-doped PEDOT film and  $\text{CNBH}_3^-$  ion doped PEDOT film in acetonitrile at different applied potentials (0V, 0.33V, 0.55V, 1.0V and 1.5V vs pseudo reference of Ag) in the range between  $200\text{ cm}^{-1}$  and  $2000\text{ cm}^{-1}$  using 785 nm excitation. The symmetric stretching vibrations of  $\text{C}_\alpha=\text{C}_\beta$  appeared at  $1414\text{ cm}^{-1}$  for de-doped PEDOT film and shifted to  $1445\text{ cm}^{-1}$  for  $\text{CNBH}_3^-$  doped PEDOT film as identified through red Laser Raman (785 nm excitation) spectroscopy. The maximum extent of  $\text{CNBH}_3^-$  doping was achieved by varying the applied potential to 1.5V. The symmetric stretching vibration intensity of  $\text{C}_\alpha=\text{C}_\beta$  increases with increasing applied potentials. The doping level percentage was calculated from the ratio of integrated intensity of symmetry stretching value at  $1414\text{ cm}^{-1}$  (de-doped PEDOT) and  $1445\text{ cm}^{-1}$  ( $\text{CNBH}_3^-$  ion doped-PEDOT). From these intensity values, the doping level percentage was calculated using this formula  $I = 0.087y - 2.279$ , where I-is the natural logarithm of the ratio of intensity values of de-doped and  $\text{CNBH}_3^-$  ion doped PEDOT and y-is the percentage doping level of PEDOT. The percentage of  $\text{ClO}_4^-$  ion doped PEDOT film was found to be 42.3% and 34.47 % for  $\text{CNBH}_3^-$  ion doped film. It can be concluded that  $\text{CNBH}_3^-$  ion exchange in PEDOT proceeded successfully with change in the applied potentials (0.3 V, 0.45 V, 0.55 V and 1.0 V).

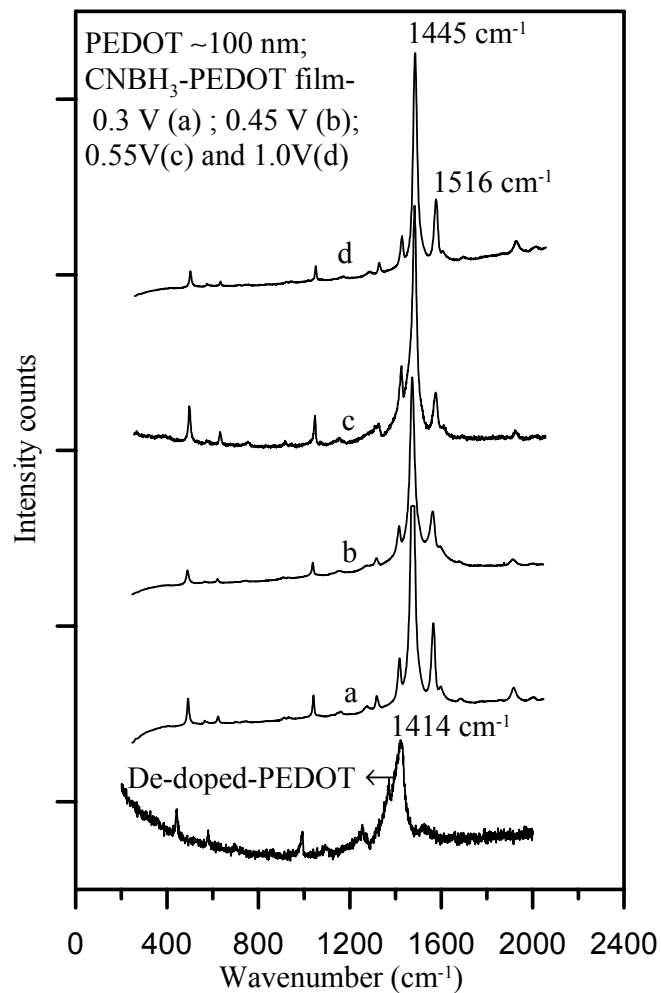

**Fig. S2.** Raman spectra (785 nm excitation) of de-doped PEDOT and various amounts of CNBH<sub>3</sub><sup>-</sup> ion loaded PEDOT film in acetonitrile at different applied potentials

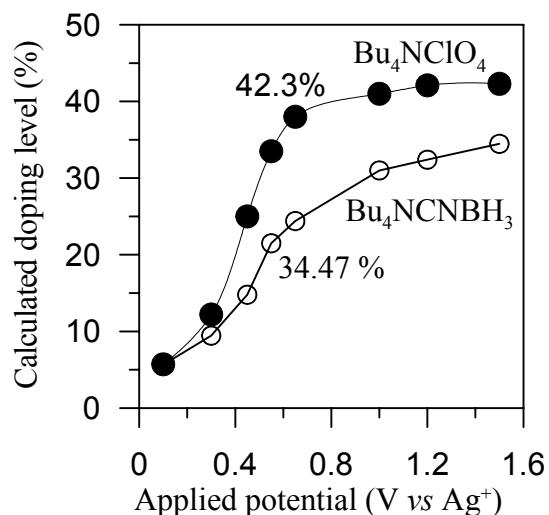

**Fig. S3.** Plot of the calculated doping level of the de-doped PEDOT film re-doped with  $\text{ClO}_4^-$  and  $\text{CNBH}_3^-$  ions in acetonitrile medium vs. applied potential

**Conductivity measurements:**

Table-1: Conductivity values of PEDOT film determined by four-probe resistivity set-up.

| Sl.No | Nature of PEDOT film                            | Conductivity ( $\sigma$ ) (S/cm) |
|-------|-------------------------------------------------|----------------------------------|
| 1.    | De-doped PEDOT containing $\text{ClO}_4^-$ ions | 44.4                             |
| 2.    | $\text{PEDOT}^+ \text{ClO}_4^-$ film            | 251.35                           |
| 3.    | $\text{PEDOT}^+ \text{(CNBH}_3^-)$ film         | 201.2                            |

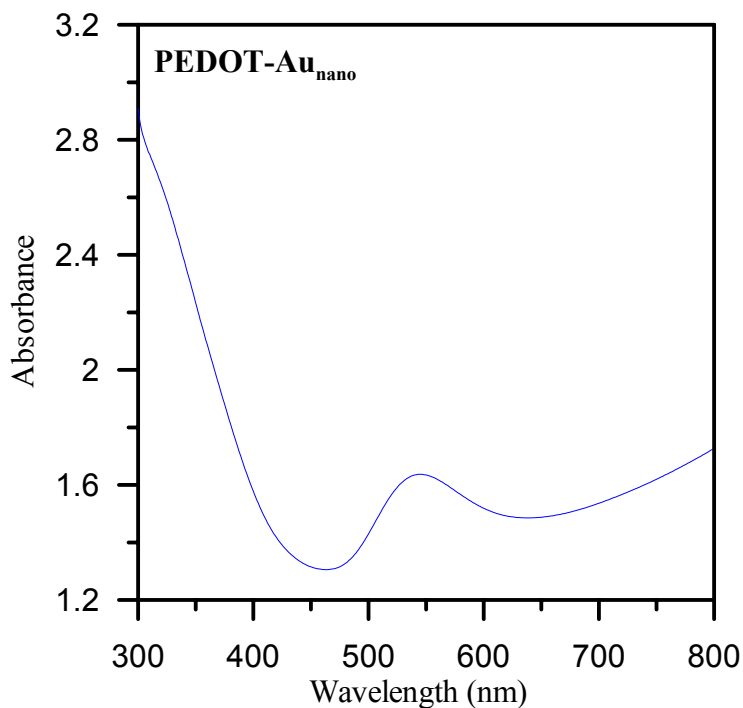

**Fig. S4** UV-Visible spectrum for Au nanoparticles entrapped PEDOT film

The SPR band of PEDOT-Au<sub>nano</sub> (534nm) is clearly seen in Fig. S2, but anisotropic (Triangular, pentagon, and hexagon) absorbance bands of Au<sub>nano</sub> (700-900 nm) are merged with polaronic/bipoloronic transition of PEDOT support.

### FT-IR spectroscopy

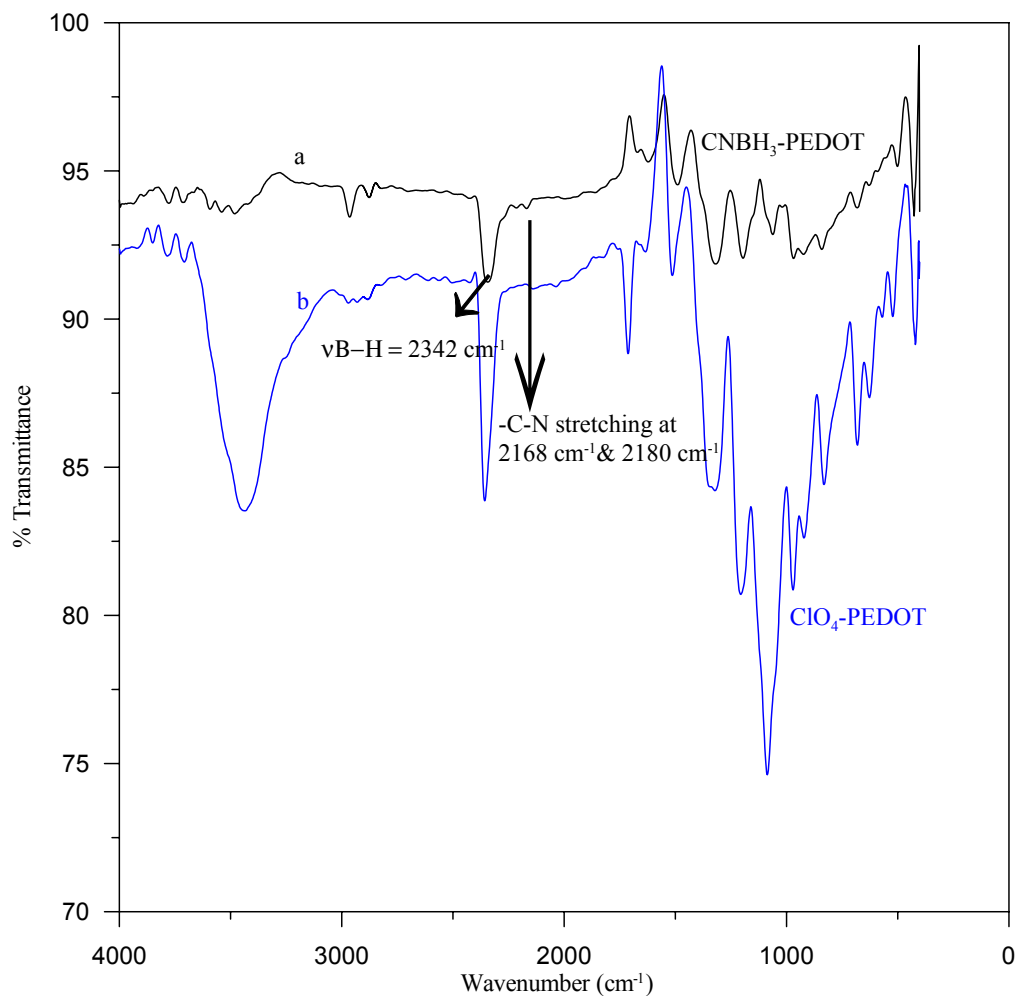

**Fig. S5: FT-IR Spectra for the solid CNBH<sub>3</sub>-PEDOT (a) and ClO<sub>4</sub>-PEDOT (b) films**

### Determination of surface Area of Metal<sub>nano</sub>-PEDOT films

The amount of Pt nanoparticles in PEDOT was determined by calculating the  $H_{\text{upd}}$  charge of cyclic voltammogram of Pt<sub>nano</sub>-PEDOT film recorded in 0.5 M H<sub>2</sub>SO<sub>4</sub> vs. MSE. Loading of Pt particles in terms of the hydrogen-upd charge in PEDOT polymer was in the range between 0.223 mC/cm<sup>2</sup> and 0.906 mC/cm<sup>2</sup>.

The weight of Au nanoparticles in polymer matrix can be estimated by calculating the area of cathodic reduction peak of cyclic voltammogram recorded in 0.5M H<sub>2</sub>SO<sub>4</sub> background electrolytes at a scan rate of 50 mV/s.

Table-2: Calculation of values of surface area of Pt<sub>nano</sub>-PEDOT, and Au<sub>nano</sub>-PEDOT films.

| Sl. No | Doping period of TBACNBH <sub>3</sub> (Time in hrs) | $H_{\text{upd}}$ charge of Pt <sub>nano</sub> -PEDOT (mC/cm <sup>2</sup> ) | Surface Area of Pt <sub>nano</sub> -PEDOT (cm <sup>2</sup> ) | Charge of cathodic reduction peak of Au <sub>nano</sub> -PEDOT (mC/cm <sup>2</sup> ) | Surface area of Au <sub>nano</sub> -PEDOT (cm <sup>2</sup> ) |
|--------|-----------------------------------------------------|----------------------------------------------------------------------------|--------------------------------------------------------------|--------------------------------------------------------------------------------------|--------------------------------------------------------------|
| 1      | 3                                                   | 0.223                                                                      | 1.06                                                         | 14.41 x 10 <sup>-3</sup>                                                             | 35.15 x 10 <sup>-3</sup>                                     |
| 2      | 6                                                   | 0.346                                                                      | 1.65                                                         | 23.80 x 10 <sup>-3</sup>                                                             | 58.05 x 10 <sup>-3</sup>                                     |
| 3      | 9                                                   | 0.597                                                                      | 2.84                                                         | 31.81 x 10 <sup>-3</sup>                                                             | 77.59 x 10 <sup>-3</sup>                                     |
| 4      | 12                                                  | 0.947                                                                      | 4.51                                                         | 43.77 x 10 <sup>-3</sup>                                                             | 106.76 x 10 <sup>-3</sup>                                    |
| 5      | 18                                                  | 0.906                                                                      | 4.32                                                         | 39.81 x 10 <sup>-3</sup>                                                             | 97.1 x 10 <sup>-3</sup>                                      |

$$\text{Surface area, } A_{\text{Pt}} = Q_{H_{\text{upd}}} \text{ of Pt}_{\text{nano}}\text{-PEDOT} / 0.210 \text{ mC/cm}^2$$

$$\text{Surface area, } A_{\text{Au}} = Q_{\text{cathodic reduction peak of Au}_{\text{nano}}\text{-PEDOT}} / 0.410 \text{ mC/cm}^2$$

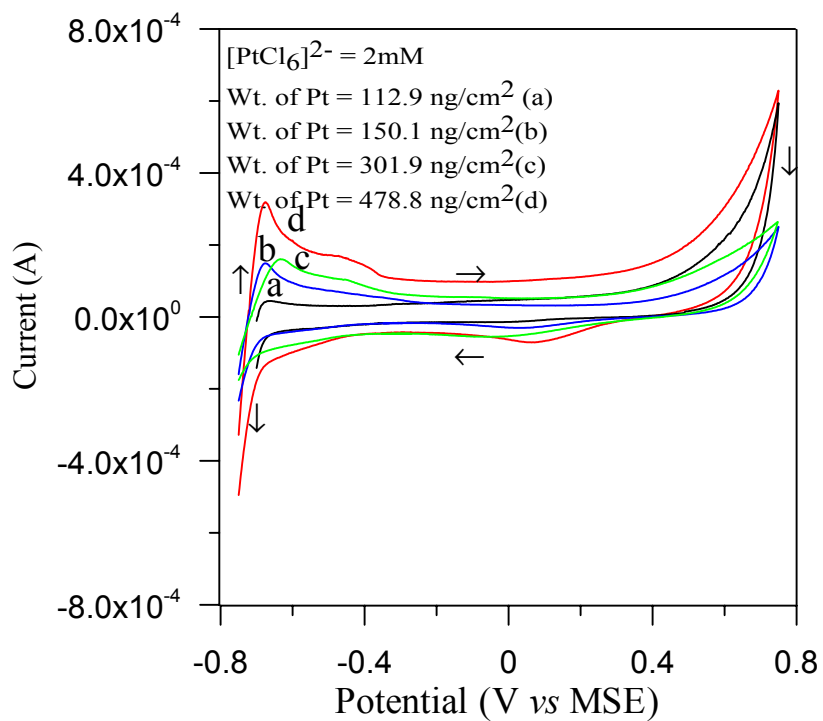

**Fig.S6.** Cyclic voltammograms representing different loading levels of Pt nanocatalyst on PEDOT film using various doping periods of  $\text{CNBH}_3^-$  ion in the PEDOT matrix. (Doping period a = 3 hrs , b = 6 hrs , c = 9 hrs and d = 12 hrs)



**Fig.S7: Electrocatalytic oxidation of formic acid using Pt<sub>nano</sub>-PEDOT film in 0.5 M H<sub>2</sub>SO<sub>4</sub>**

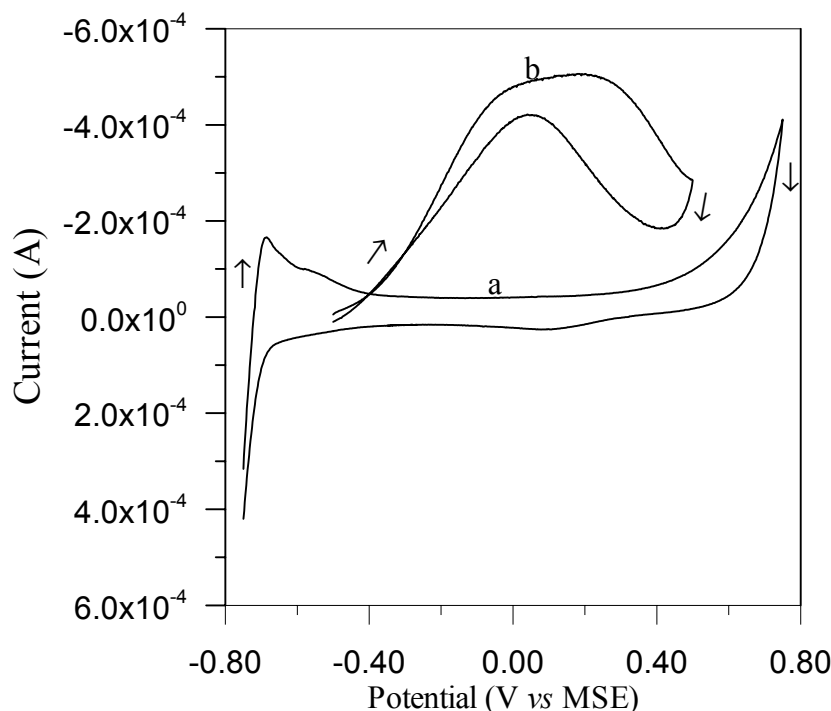

**Fig. S7** Cyclic voltammogram of ( $Q = 0.947 \text{ mC}\cdot\text{cm}^{-2}$ ) Pt nanoparticles loaded PEDOT film on glassy carbon electrode in 0.5 M H<sub>2</sub>SO<sub>4</sub> at a scan rate of 50mV/s a) without formic acid; b) with 0.5 M formic acid

#### **Electrocatalytic oxidation of NaBH<sub>4</sub> on Pt<sub>nano</sub>-PEDOT and Au<sub>nano</sub>-PEDOT films**

The metal nanoparticles loaded PEDOT film was tested for borohydride oxidation as discussed below. Fig. S8(A-B) shows the CV pattern of Pt, Au nanoparticles loaded PEDOT for the electro-oxidation of 0.05 M NaBH<sub>4</sub> oxidation in 2M NaOH at a scan rate of 50 mV/s. Two broad oxidation peaks (0.175V, and 0.6V) were observed in the forward scan and one sharp anodic peak at 0.4V was observed in the reverse scan. In Au<sub>nano</sub>-PEDOT matrix, there is no hydrolysis reaction occurring for BH<sub>4</sub><sup>-</sup> oxidation due to high hydrogen overpotential on the Au surface. Only electro-oxidation of BH<sub>4</sub><sup>-</sup> takes place on Au<sub>nano</sub> loaded PEDOT film. Therefore, two broad peaks are observed corresponding to two electron oxidation in the forward scan and in the reverse scan a sharp peak was seen for 6e<sup>-</sup> oxidation at 0.4V.

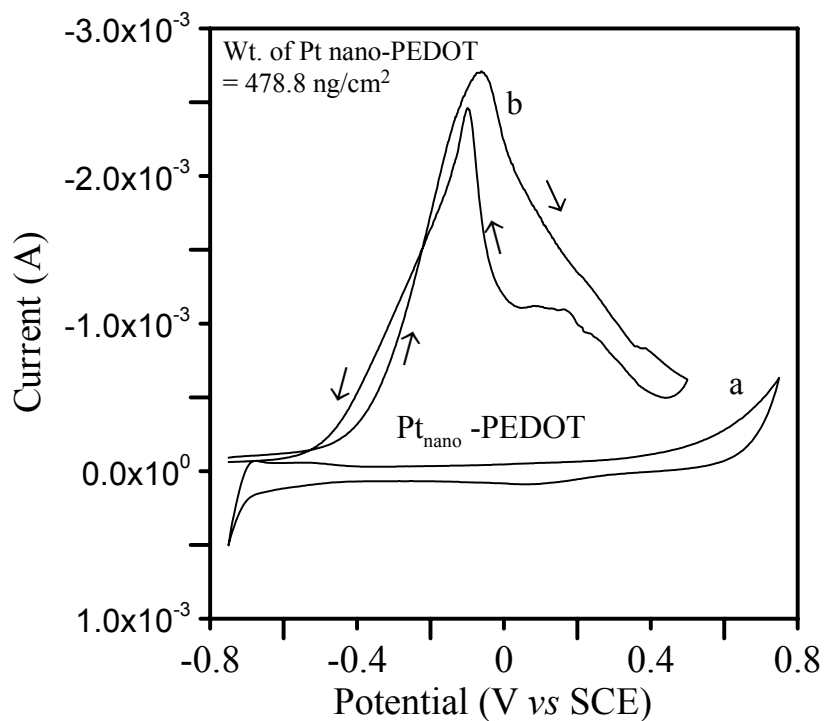

**Fig. S8A:** Cyclic voltammogram of borohydride oxidation: 2M NaOH (a); 2M NaOH + 0.05 M NaBH<sub>4</sub> on Pt<sub>nano</sub>-PEDOT (b) at a scan rate of 50mV/s

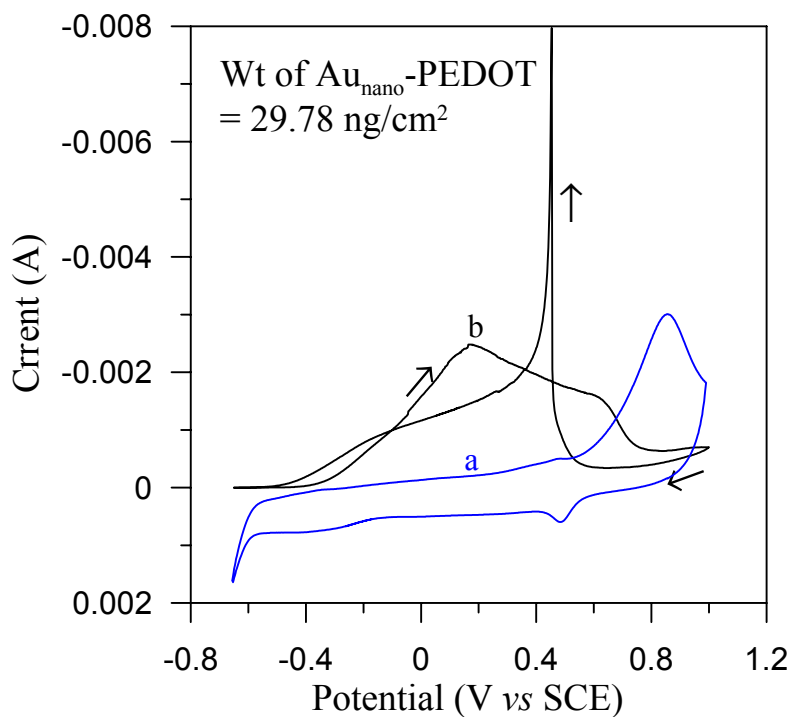

**Fig. S8B.** Cyclic voltammogram of borohydride oxidation: 2M NaOH (a); NaOH + 0.05 M NaBH<sub>4</sub> on Au<sub>nano</sub>-PEDOT (b) at a scan rate of 50 mV/s.

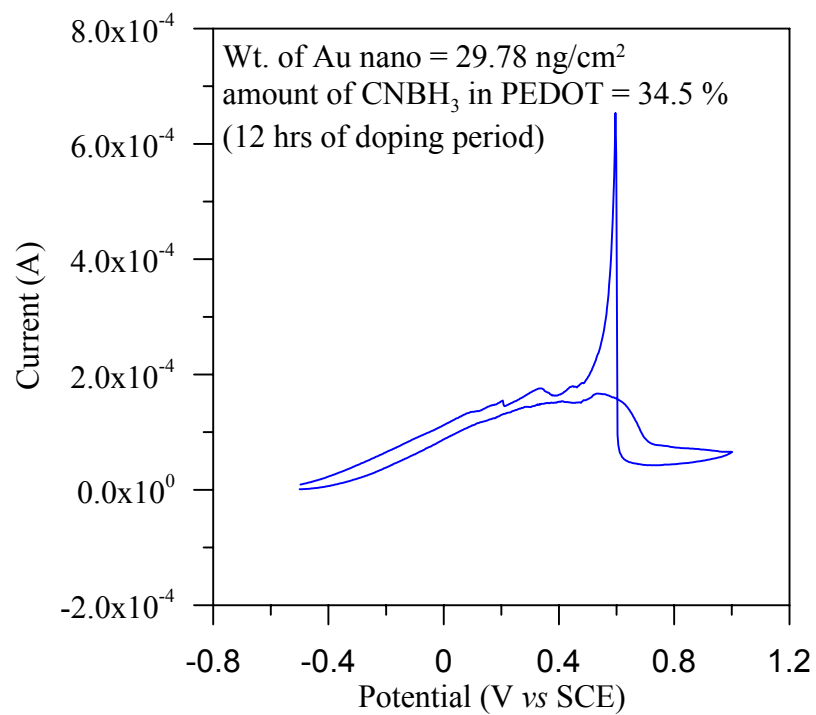

Fig. S9. Cyclic voltammogram for oxidation of CNBH<sub>3</sub> contained in the Au<sub>nano</sub>/CNBH<sub>3</sub>-PEDOT film recorded in 2M NaOH solution.
